# Supplementary material for: Supply chain risks of critical metals: Sources, propagation, and responses
Source: Frontiers journal article supplement (doi:10.3389/fenrg.2022.957884), 2022-08-11
Supplement: Table_1.DOCX [file Table_1.DOCX]

Table S1 Supply risk assessment studies

| Risk indicator | References |
| --- | --- |
| Country concentration | U.S. Deparment of Energy (2011), Graedel et al. (2012), Moss et al. (2013), Harper et al. (2015), National Science Technology Council (2016), Habib et al. (2016), Rabe et al. (2017), McCullough and Nassar (2017), Yan et al. (2021), Althaf and Babbitt (2021), Yu et al. (2021), Zhang, L. et al. (2022) |
| Country risk (social and political factors) | U.S. Deparment of Energy (2011), Graedel et al. (2012), Moss et al. (2013), Goe and Gaustad (2014), Harper et al. (2015), National Science Technology Council (2016), Habib and Wenzel (2016), McCullough and Nassar (2017), Blengini et al. (2017), Cimprich et al. (2017), Yan et al. (2020), Yan et al. (2021), Althaf and Babbitt (2021), Yu et al. (2021), Zhang, L. et al. (2022) |
| Depletion time | U.S. Deparment of Energy (2011), Graedel et al. (2012), Goe and Gaustad (2014), Harper et al. (2015), Habib and Wenzel (2016), Yan et al. (2020), Althaf and Babbitt (2021), Yu et al. (2021), Zhang, L. et al. (2022) |
| By-product dependency | U.S. Deparment of Energy (2011), Graedel et al. (2012), Harper et al. (2015), Nassar et al. (2016), Fu et al. (2019), Althaf and Babbitt (2021) |
| Company concentration | U.S. Deparment of Energy (2011) |
| Demand growth | U.S. Deparment of Energy (2011), Moss et al. (2013), Yan et al. (2020), Althaf and Babbitt (2021) |
| Recycling | Goe and Gaustad (2014), Blengini et al. (2017), Sprecher et al. (2017), Mancheri et al. (2018), Yan et al. (2021), Yu et al. (2021), Zhang, L. et al. (2022) |
| Substitutability | Graedel et al. (2012), Harper et al. (2015), Nassar et al. (2015), Blengini et al. (2017), Sprecher et al. (2017), Mancheri et al. (2018), Yan et al. (2021), Yu et al. (2021) |
| Import dependence | Graedel et al. (2012), Goe and Gaustad (2014), Harper et al. (2015), Nassar et al. (2015), Cimprich et al. (2017), Yan et al. (2021), Yu et al. (2021), Althaf and Babbitt (2021) |
| Commodity prices | Henckens et al. (2016), Sprecher et al. (2017), Mancheri et al. (2018), Althaf and Babbitt (2021), Zhang, L. et al. (2022) |
| Production costs in extraction | Sverdrup et al. (2017) |
| Investment in mining | Yu et al. (2021) |
| Stock keeping | Sprecher et al. (2017), Mancheri et al. (2018), |
| Market balance | Sprecher et al. (2017), Mancheri et al. (2018), |
| Production capacity | Moss et al. (2013), Sverdrup et al. (2017), Choi et al. (2018), Yan et al. (2020), Althaf and Babbitt (2021) |
| Environmental sustainability | Graedel et al. (2012), Yu et al. (2021), Althaf and Babbitt (2021), Zhang, L. et al. (2022) |
| Abundance in earth’s crust | Althaf and Babbitt (2021) |
| Trade risk | Geenen (2012), Klimek et al. (2015), Rabe et al. (2017), Schutte (2019), Li et al. (2021) |
| Resources competition | Huang et al. (2021), Liu et al. (2021), Shao et al. (2021), Zhang, H. et al. (2022) |
| Ore concentration | Althaf and Babbitt (2021), |
| Thermodynamic rarity | Calvo et al. (2018), |
| Supply chain resilience | Yan et al. (2020) |

References:

Althaf, S., Babbitt, C.W., 2021. Disruption risks to material supply chains in the electronics sector. Resources, Conservation and Recycling 167, 105248.

Blengini, G.A., Nuss, P., Dewulf, J., Nita, V., Peirò, L.T., Vidal-Legaz, B., Latunussa, C., Mancini, L., Blagoeva, D., Pennington, D., Pellegrini, M., Van Maercke, A., Solar, S., Grohol, M., Ciupagea, C., 2017. EU methodology for critical raw materials assessment: Policy needs and proposed solutions for incremental improvements. Resources Policy 53, 12-19.

Calvo, G., Valero, A., Valero, A., 2018. Thermodynamic Approach to Evaluate the Criticality of Raw Materials and Its Application through a Material Flow Analysis in Europe. Journal of Industrial Ecology 22(4), 839-852.

Choi, C.H., Eun, J., Cao, J., Lee, S., Zhao, F., 2018. Global strategic level supply planning of materials critical to clean energy technologies – A case study on indium. Energy 147, 950-964.

Cimprich, A., Young, S.B., Helbig, C., Gemechu, E.D., Thorenz, A., Tuma, A., Sonnemann, G., 2017. Extension of geopolitical supply risk methodology: Characterization model applied to conventional and electric vehicles. Journal of Cleaner Production 162, 754-763.

Fu, X.K., Polli, A., Olivetti, E., 2019. High-Resolution Insight into Materials Criticality: Quantifying Risk for By-Product Metals from Primary Production. Journal of Industrial Ecology 23(2), 452-465.

Geenen, S., 2012. A dangerous bet: The challenges of formalizing artisanal mining in the Democratic Republic of Congo. Resources Policy 37(3), 322-330.

Goe, M., Gaustad, G., 2014. Identifying critical materials for photovoltaics in the US: A multi-metric approach. Applied Energy 123, 387-396.

Graedel, T.E., Barr, R., Chandler, C., Chase, T., Choi, J., Christoffersen, L., Friedlander, E., Henly, C., Jun, C., Nassar, N.T., Schechner, D., Warren, S., Yang, M.Y., Zhu, C., 2012. Methodology of Metal Criticality Determination. Environmental Science & Technology 46(2), 1063-1070.

Habib, K., Hamelin, L., Wenzel, H., 2016. A dynamic perspective of the geopolitical supply risk of metals. Journal of Cleaner Production 133, 850-858.

Habib, K., Wenzel, H., 2016. Reviewing resource criticality assessment from a dynamic and technology specific perspective – using the case of direct-drive wind turbines. Journal of Cleaner Production 112, 3852-3863.

Harper, E.M., Kavlak, G., Burmeister, L., Eckelman, M.J., Erbis, S., Sebastian Espinoza, V., Nuss, P., Graedel, T.E., 2015. Criticality of the Geological Zinc, Tin, and Lead Family. Journal of Industrial Ecology 19(4), 628-644.

Henckens, M.L.C.M., van Ierland, E.C., Driessen, P.P.J., Worrell, E., 2016. Mineral resources: Geological scarcity, market price trends, and future generations. Resources Policy 49, 102-111.

Huang, J.B., Ding, Q., Wang, Y., Hong, H.J., Zhang, H.W., 2021. The evolution and influencing factors of international tungsten competition from the industrial chain perspective. Resources Policy 73, 12.

Klimek, P., Obersteiner, M., Thurner, S., 2015. Systemic trade risk of critical resources. Science Advances 1(10), 7.

Li, B.H., Li, H.J., Dong, Z.L., Lu, Y., Liu, N.R., Hao, X.Q., 2021. The global copper material trade network and risk evaluation: A industry chain perspective. Resources Policy 74, 10.

Liu, H.P., Li, H.J., Qi, Y.J., An, P.L., Shi, J.L., Liu, Y.X., 2021. Identification of high-risk agents and relationships in nickel, cobalt, and lithium trade based on resource-dependent networks. Resources Policy 74, 12.

Mancheri, N.A., Sprecher, B., Deetman, S., Young, S.B., Bleischwitz, R., Dong, L., Kleijn, R., Tukker, A., 2018. Resilience in the tantalum supply chain. Resources, Conservation and Recycling 129, 56-69.

McCullough, E., Nassar, N.T., 2017. Assessment of critical minerals: updated application of an early-warning screening methodology. Mineral Economics 30(3), 257-272.

Moss, R.L., Tzimas, E., Kara, H., Willis, P., Kooroshy, J., 2013. The potential risks from metals bottlenecks to the deployment of Strategic Energy Technologies. Energy Policy 55, 556-564.

Nassar, N.T., Du, X.Y., Graedel, T.E., 2015. Criticality of the Rare Earth Elements. Journal of Industrial Ecology 19(6), 1044-1054.

Nassar, N.T., Wilburn, D.R., Goonan, T.G., 2016. Byproduct metal requirements for U.S. wind and solar photovoltaic electricity generation up to the year 2040 under various Clean Power Plan scenarios. Applied Energy 183, 1209-1226.

National Science Technology Council, 2016. Assessment of critical minerals: Screening methodology and initial application. Executive Office of the President of the United States.

Rabe, W., Kostka, G., Smith Stegen, K., 2017. China's supply of critical raw materials: Risks for Europe's solar and wind industries? Energy Policy 101, 692-699.

Schutte, P., 2019. International mineral trade on the background of due diligence regulation: A case study of tantalum and tin supply chains from East and Central Africa. Resources Policy 62, 674-689.

Shao, L.G., Hu, J.Y., Zhang, H., 2021. Evolution of global lithium competition network pattern and its influence factors. Resources Policy 74, 9.

Sprecher, B., Daigo, I., Spekkink, W., Vos, M., Kleijn, R., Murakami, S., Kramer, G.J., 2017. Novel Indicators for the Quantification of Resilience in Critical Material Supply Chains, with a 2010 Rare Earth Crisis Case Study. Environmental Science & Technology 51(7), 3860-3870.

Sverdrup, H.U., Ragnarsdottir, K.V., Koca, D., 2017. An assessment of metal supply sustainability as an input to policy: security of supply extraction rates, stocks-in-use, recycling, and risk of scarcity. Journal of Cleaner Production 140, 359-372.

U.S. Deparment of Energy, 2011. Critical Materials Strategy. <https://www.energy.gov/sites/prod/files/DOE_CMS2011_FINAL_Full.pdf>. (Accessed 2022-05-22 2022).

Yan, W., Cao, H., Zhang, Y., Ning, P., Song, Q., Yang, J., Sun, Z., 2020. Rethinking Chinese supply resilience of critical metals in lithium-ion batteries. Journal of Cleaner Production 256, 120719.

Yan, W., Wang, Z., Cao, H., Zhang, Y., Sun, Z., 2021. Criticality assessment of metal resources in China. iScience 24(6), 102524.

Yu, S.W., Duan, H.R., Cheng, J.H., 2021. An evaluation of the supply risk for China's strategic metallic mineral resources. Resources Policy 70, 13.

Zhang, H., Wang, X., Tang, J., Guo, Y., 2022. The impact of international rare earth trade competition on global value chain upgrading from the industrial chain perspective. Ecological Economics 198, 107472.

Zhang, L., Chen, Z., Yang, C., Xu, Z., 2022. Global supply risk assessment of the metals used in clean energy technologies. Journal of Cleaner Production 331, 129602.
